# Supplementary material
Source: PubMed Central journal article supplement (PMC3622453)
Supplement: NIHMS458163-supplement-Supplementary_Information.pdf [file NIHMS458163-supplement-Supplementary_Information.pdf]

## SUPPLEMENTARY INFORMATION

### 8 Supplementary figures

## **Tumor-infiltrating dendritic cells suppress nucleic acid-mediated innate immune responses through TIM-3-HMGB1 interactions**

Shigeki Chiba <sup>1</sup>, Muhammad Baghdadi <sup>1,3,4</sup>, Hisaya Akiba <sup>6</sup>, Hironori Yoshiyama <sup>1</sup>, Ichiro Kinoshita <sup>4</sup>, Hirotohi Dosaka-Akita <sup>4</sup>, Yoichiro Fujioka <sup>5</sup>, Yusuke Ohba <sup>5</sup>, Jacob V. Gorman <sup>7</sup>, John D. Colgan <sup>7</sup>, Mitsuomi Hirashima <sup>8</sup>, Toshimitsu Uede <sup>2</sup>, Akinori Takaoka <sup>3</sup>, Hideo Yagita <sup>6</sup>, Masahisa Jinushi <sup>1</sup>

<sup>1</sup> Research Center for Infection-Associated Cancer, <sup>2</sup> Division of Molecular Immunology, <sup>3</sup> Division of Signaling on Cancer and Immunology, Institute for Genetic Medicine, Hokkaido University, Sapporo, 060-0815, Japan.

<sup>4</sup> Department of Medical Oncology, <sup>5</sup> Department of Pathophysiology and Signal Transduction, Hokkaido University Graduate School of Medicine, Sapporo, 060-0815, Japan.

<sup>6</sup> Department of Immunology, Juntendo University School of Medicine, Tokyo, 113-8421, Japan

<sup>7</sup> Department of Internal Medicine, University of Iowa, Iowa City, IA, 52242, USA

<sup>8</sup> Department of Immunology and Immunopathology, Faculty of Medicine, Kagawa University, Kita-gun, Kagawa, 761-0791, Japan

Correspondence should be addressed to MJ: (Jinushi@igm.hokudai.ac.jp)

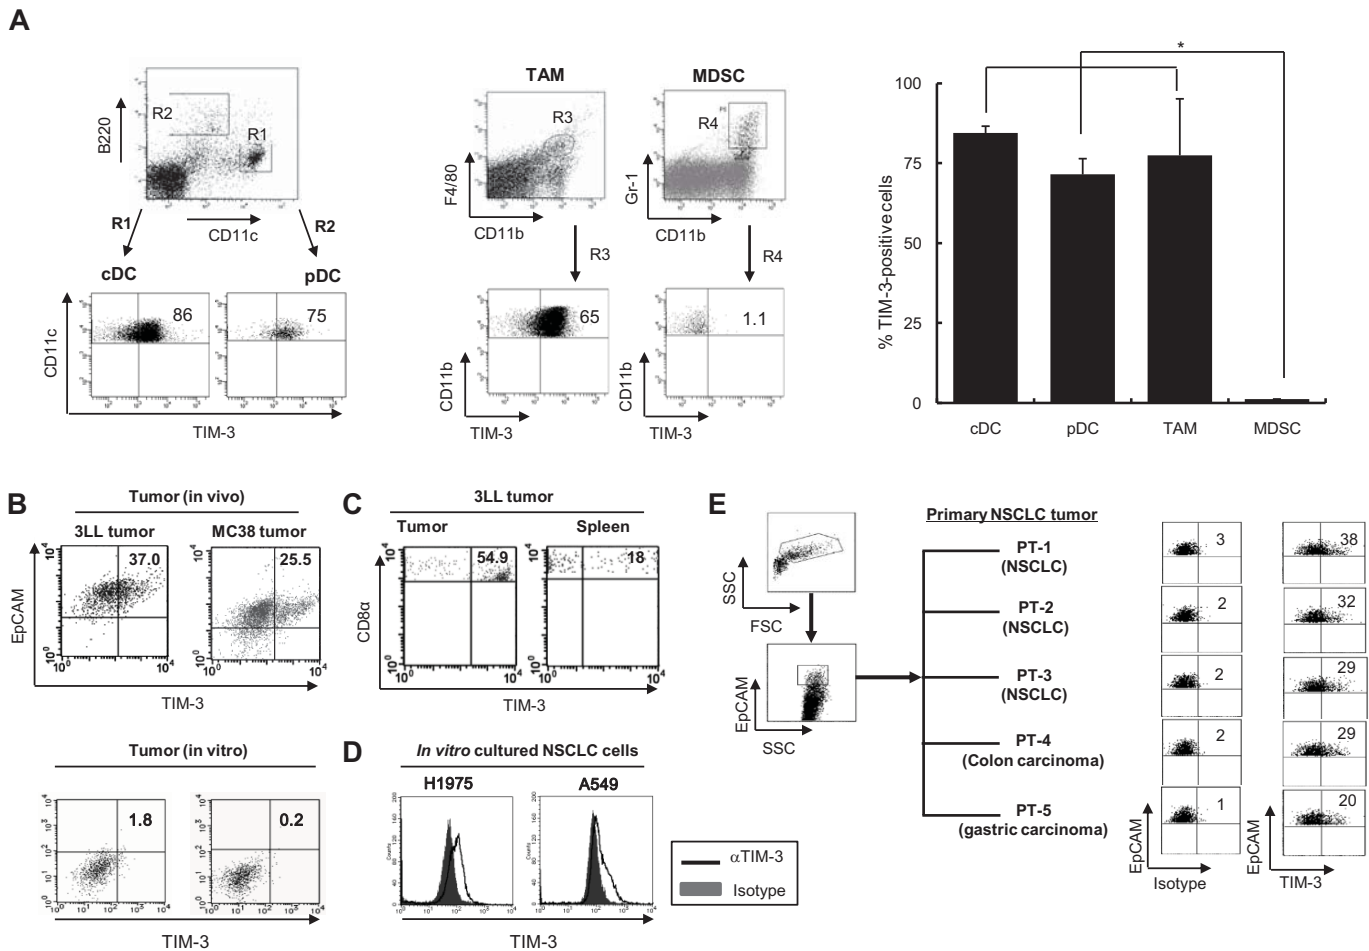

**Supplementary Figure 1. TIM-3 expression in tumor cells and tumor infiltrating immune cells.**

(A) F4/80<sup>+</sup>CD11b<sup>+</sup> macrophages (TAM) (R3), CD11b<sup>+</sup>Gr-1<sup>+</sup> myeloid-derived suppressor cells (MDSC) (R4) and CD11c<sup>high</sup> DC (cDC) (R1), and CD11c<sup>low</sup> B220<sup>+</sup> plasmacytoid DC (pDC) (R2) isolated from 3LL tumors were subjected to TIM-3 expression analysis by flow cytometry. Representative data (left) and the percentages of TIM-3<sup>+</sup> cells (right) are shown. (B, C) TIM-3 expression was evaluated on EpCAM<sup>+</sup> MC38 or 3LL tumor cells cultured *in vitro* or isolated from established tumors *in vivo* (B), or CD8<sup>+</sup> T cells from 3LL tumor-bearing mice (C). (D) TIM-3 expression was evaluated on EpCAM<sup>+</sup> epithelial tumor cells isolated from five cancer patients (PT-1 to PT-5). The percentages of TIM-3<sup>+</sup> cells among EpCAM<sup>+</sup> epithelial cells are shown in the right-upper quadrant of each dot plot. (E) TIM-3 expression was evaluated on the *in vitro*-cultured NSCLC cell lines (H1975 and A549) by flow cytometry. Similar results were obtained in three experiments.

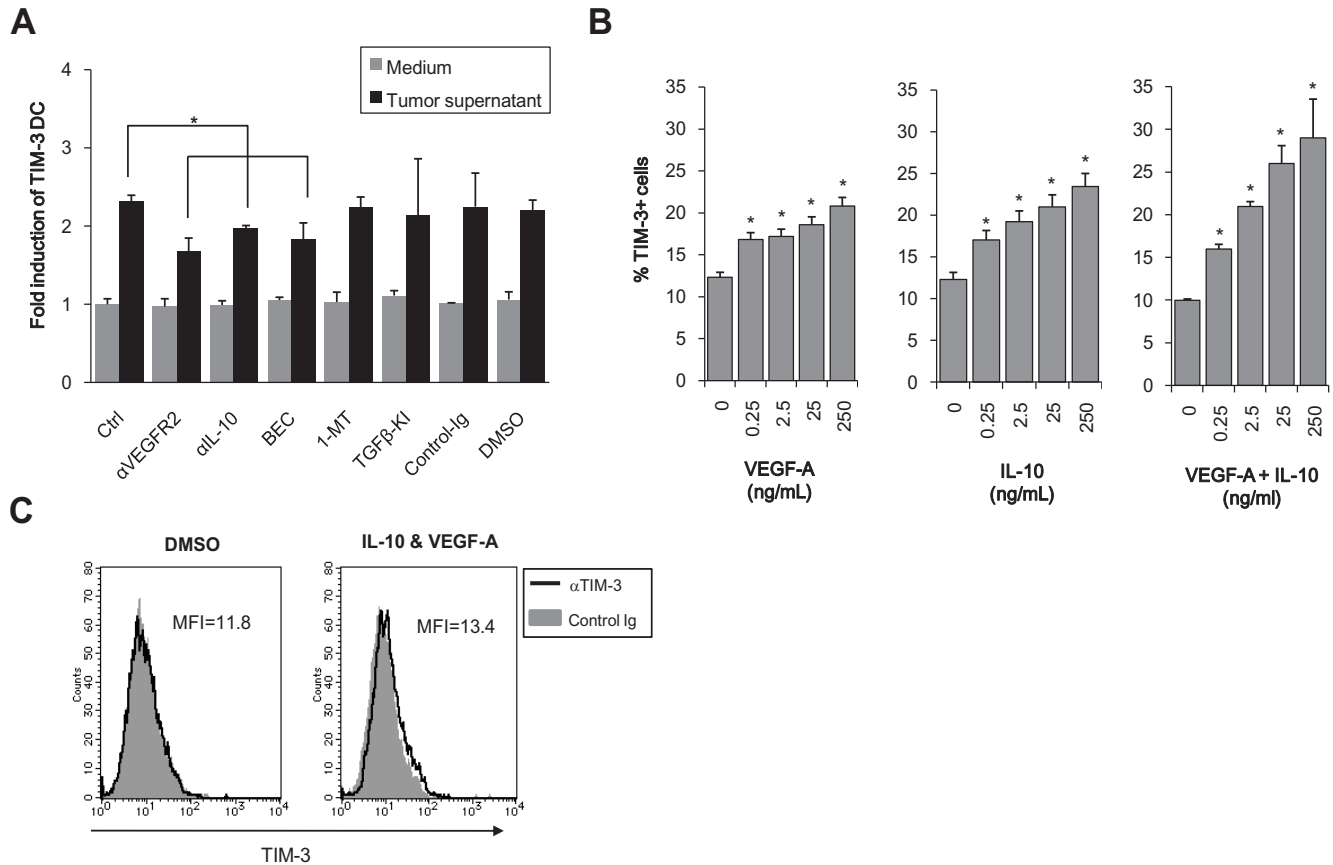

**Supplementary Figure 2. TIM-3 induction by tumor microenvironmental factors.**

(A) BMDC were treated with MC38 culture supernatants for 48 h. The culture supernatants were pretreated with blocking Ab for VEGF-R2 ( $\alpha$ VEGFR2), IL-10 ( $\alpha$ IL-10) or inhibitors for arginase-I (BEC), TGF- $\beta$ 1 receptor kinase (TGF $\beta$ -KI) or IDO (1-MT). TIM-3 expression on BMDC was evaluated by flow cytometry, and the fold induction of TIM-3<sup>+</sup> populations among CD11c<sup>+</sup> cells is shown. (B) BMDC were treated with rVEGF-A, IL-10 or both at the indicated concentrations. TIM-3 expression on BMDC was evaluated by flow cytometry and the fold induction of TIM-3<sup>+</sup> populations among CD11c<sup>+</sup> cells is shown. (C) MC38 or 3LL tumor cells were treated with VEGF-A and IL-10 for 48 h and the expression of TIM-3 was evaluated by flow cytometry.

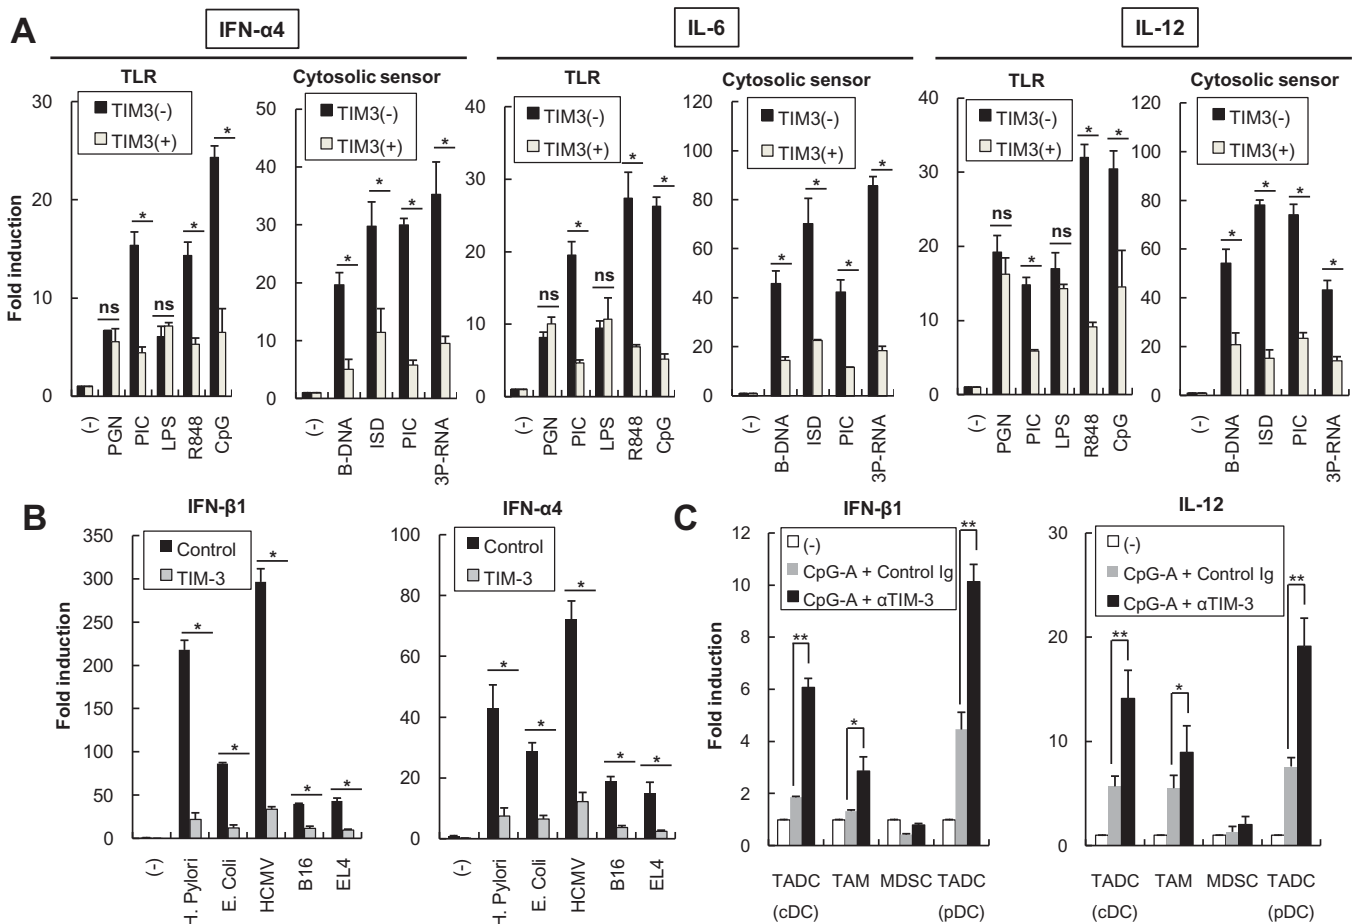

**Supplementary Figure S3. TIM-3<sup>+</sup> myeloid cells suppress innate responses mediated by nucleic acids**

(A) TIM-3<sup>+</sup> or TIM-3<sup>-</sup> BMDC were stimulated with various TLR ligands (PGN, poly(I:C), LPS, R848, CpG-ODN) or cytosolic sensors (poly(dA:dT) (B-DNA), interferon-stimulatory DNA (ISD), poly(I:C), 3p-RNA) for 8 h. The mRNA levels of IFN- $\alpha$ 4, IL-6, and IL-12 were quantified by RT-PCR. (B) MEFs were transfected with TIM-3 or control vector for 24 h, followed by stimulation with genomic DNA isolated from bacteria (*Helicobacter pylori* and *E. coli*), virus (human cytomegalovirus (HCMV)) or tumors (B16-F10 and EL-4) for 8 h. The IFN- $\beta$ 1 and IFN- $\alpha$ 4 levels were quantified by RT-PCR. (C) CD11c<sup>high</sup> DC (TADC (cDC)), CD11c<sup>int</sup>B220<sup>+</sup> DC (TADC (pDC)), F4/80<sup>+</sup>CD11b<sup>+</sup> macrophages (TAM) or CD11b<sup>+</sup>Gr-1<sup>+</sup> MDSC isolated from established 3LL tumors were pre-treated with anti-TIM-3 mAb or control Ig for 30 min followed by stimulation with CpG-A for 3 h. The IFN- $\beta$ 1 and IL-12 levels were quantified by RT-PCR.

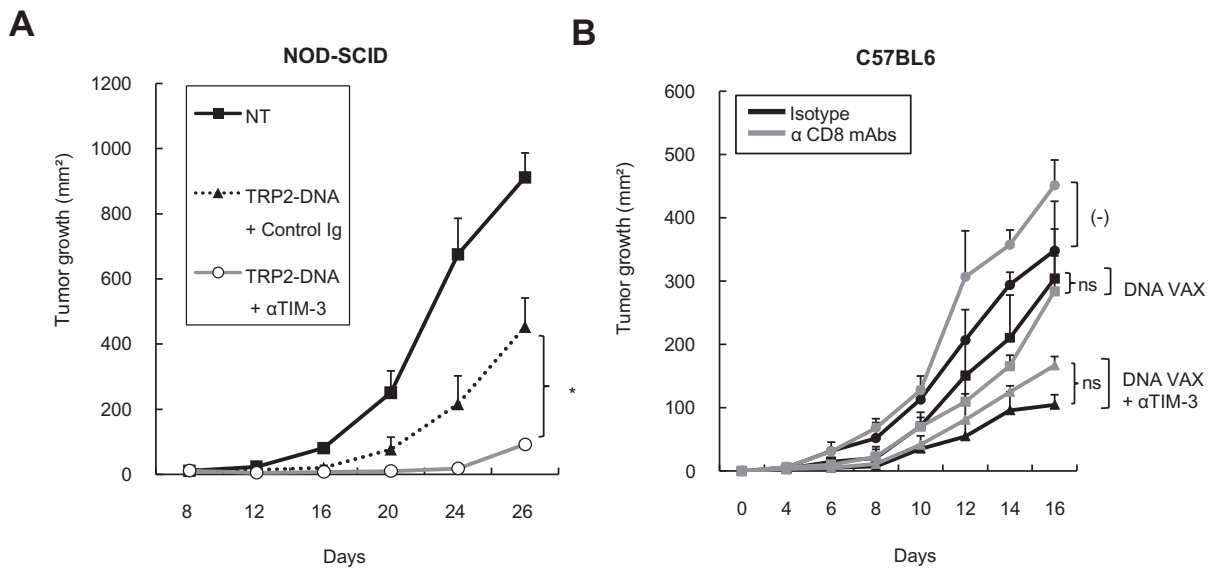

**Supplementary Figure 4. Adaptive immunity is dispensable for antitumor responses mediated by anti-TIM-3 mAb.**

(A) B16-F10 melanoma cells inoculated into NOD-SCID mice (n=4 per group) were treated with plasmid DNAs encoding TRP-2 (TRP2-DNA) in the presence of control Ig or anti-TIM-3 mAb (250  $\mu$ g, i.p.) on days 8, 10 and 12 after tumor inoculation. (B) B16-F10 melanoma cells inoculated into wild-type C57BL/6 mice (n=4 per group) were treated with plasmid DNA alone or in combination with anti-TIM-3 mAb on days 8, 10 and 12 after tumor inoculation. In some groups, the mice were treated with anti-CD8 mAb (250  $\mu$ g / mouse, ip) to deplete CD8<sup>+</sup> cells three days before tumor inoculation. Tumor growth was measured on the indicated days. NT: not treated.

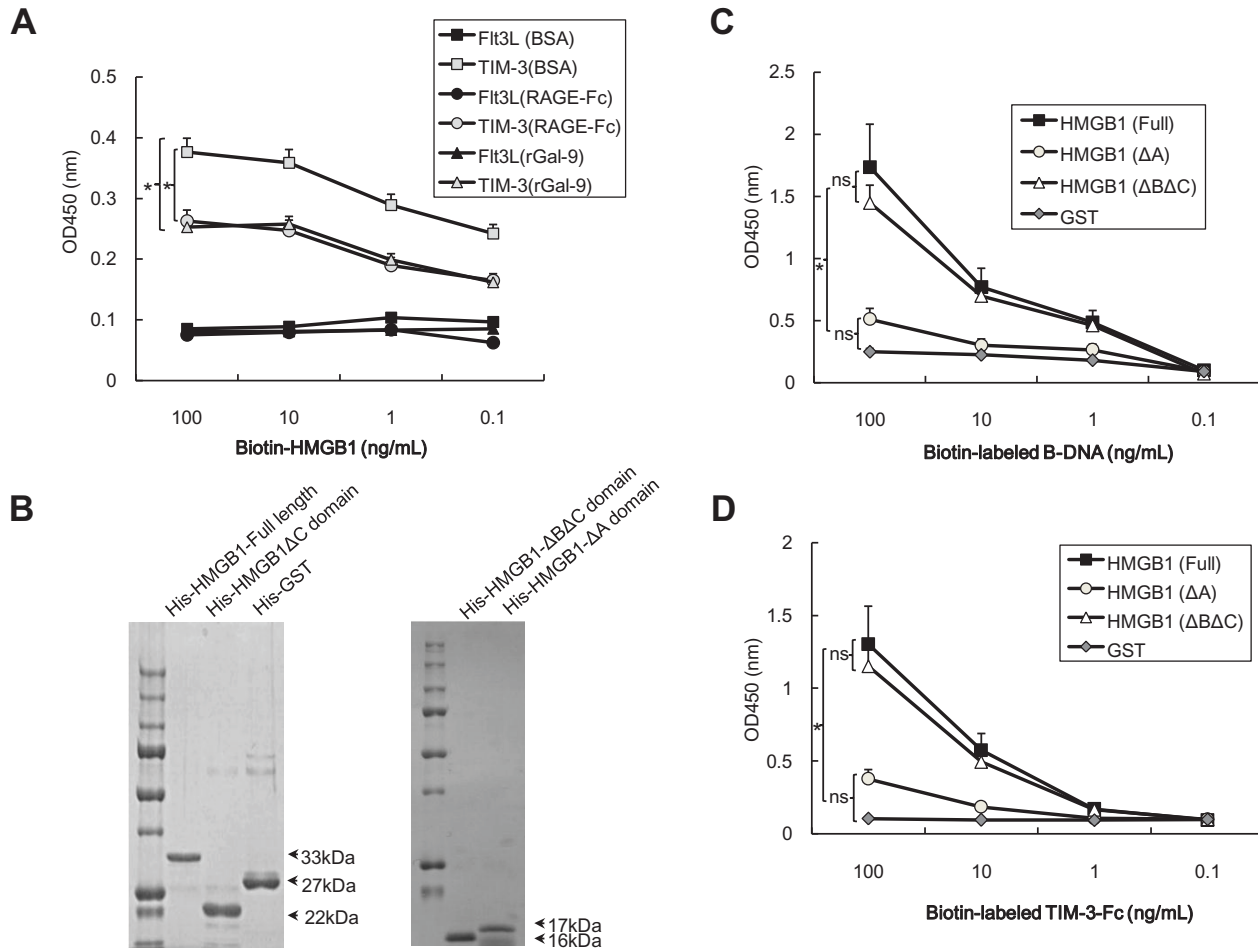

**Supplementary Figure 5. TIM-3 binds to the A-Box domain in HMGB1.**

(A) Fc-fusion proteins containing TIM-3 or Flt3L were coated onto plastic plates and biotin-labeled HMGB1 protein was added at the indicated concentrations in the presence of RAGE-Fc fusion protein (100 ng/mL), recombinant galectin-9 protein (10 ng/mL) or BSA (100 ng/mL). The binding of biotin-labeled DNA to HMGB1 was measured by colorimetric analyses (B) Generation of full-length or A, C, B/C-box-deleted HMGB1 proteins or control protein (GST). The purification of each protein was confirmed by Coomassie staining. (C) Full-length,  $\Delta$ A,  $\Delta$ B $\Delta$ C-Box or GST (control) proteins (100 ng/mL) were coated onto plastic plates, and then biotin-labeled B-DNA or TIM-3-fc fusion proteins were added at the indicated concentrations. The binding of biotin-labeled molecules to the plate-bound proteins was measured by colorimetric analysis.

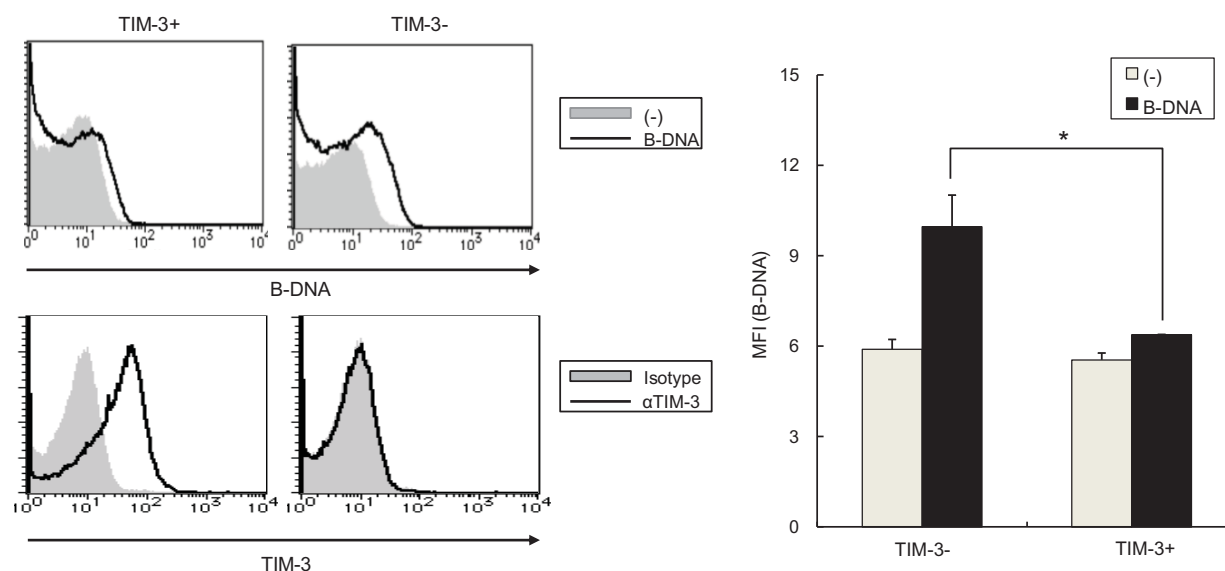

### Supplementary Figure 6. Impaired uptake of B-DNA in TIM-3<sup>+</sup> endosomes

TIM-3<sup>+</sup> or TIM-3<sup>-</sup> BMDC were treated with HMGB1 in the presence of Alexa-fluor 488-labeled B-DNA for 1 h. The endosomes isolated from these cells were fixed and stained with biotin-labeled anti-TIM-3 mAb and streptavidin-PE. Shown are histogram plots of representative experiments with the percentages of gated endosomes that were positive for B-DNA or TIM-3 indicated (Solid lines). Filled columns show unstained or secondary antibody-only stained controls. The average mean fluorescence intensity (MFI) of B-DNA in endosomes (n=3) was also shown (right panel).

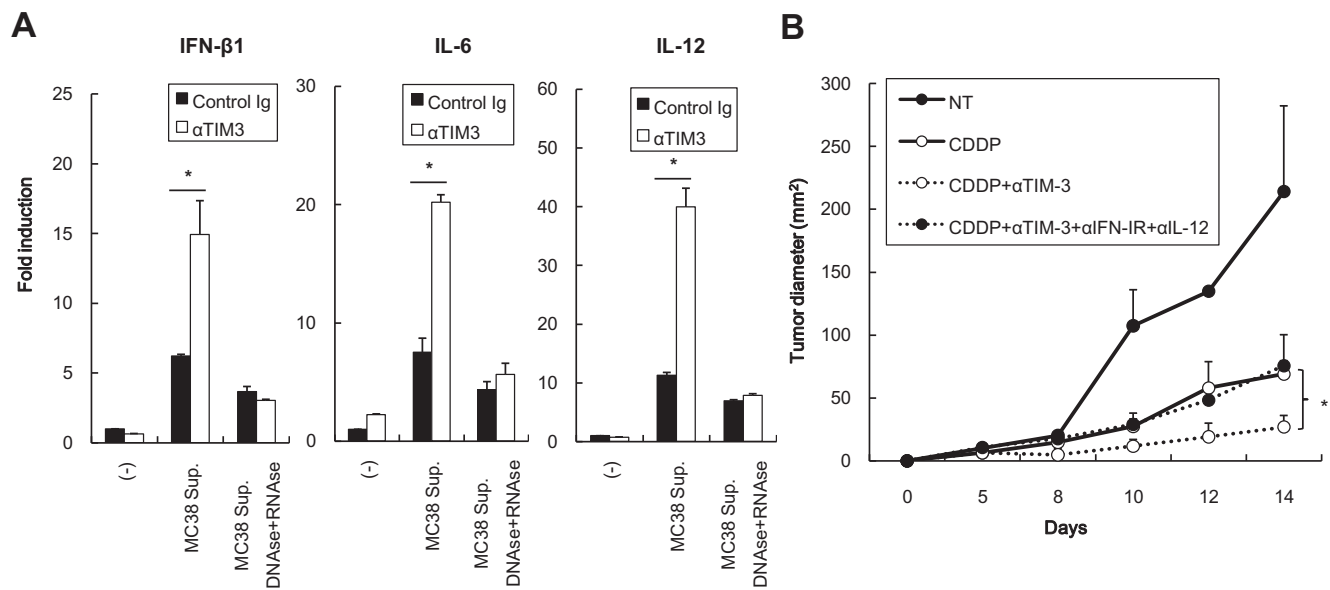

**Supplementary Figure 7. TIM-3 suppresses innate responses of nucleic acids released from dying tumor cells**

(A) MC38 cells were treated with CDDP, and TIM-3<sup>+</sup> BMDC were co-cultured with 10% supernatant of dying tumor cells in the presence of control Ig or anti-TIM-3 mAb. In some samples, dying tumor cells were treated with DNase and RNase before stimulation with tumor cell supernatant. The mRNA levels of IFN- $\beta$ 1, IL-6 and IL-12 in the cells were quantified by quantitative RT-PCR. (B) The DT-untreated CD11c-DTR mice were inoculated subcutaneously with MC38 cells ( $1 \times 10^5$ /mice) and then treated with systemic CDDP in the presence of control Ig or anti-TIM-3 mAb. For some instances, the mice treated with CDDP and anti-TIM-3 mAb were treated with neutralizing Ab for type-I IFN receptor ( $\alpha$ IFN-IR) and IL-12p40 ( $\alpha$ IL-12). Non-treated mice serves as control (NT). The tumor growth was measured on the indicated days.



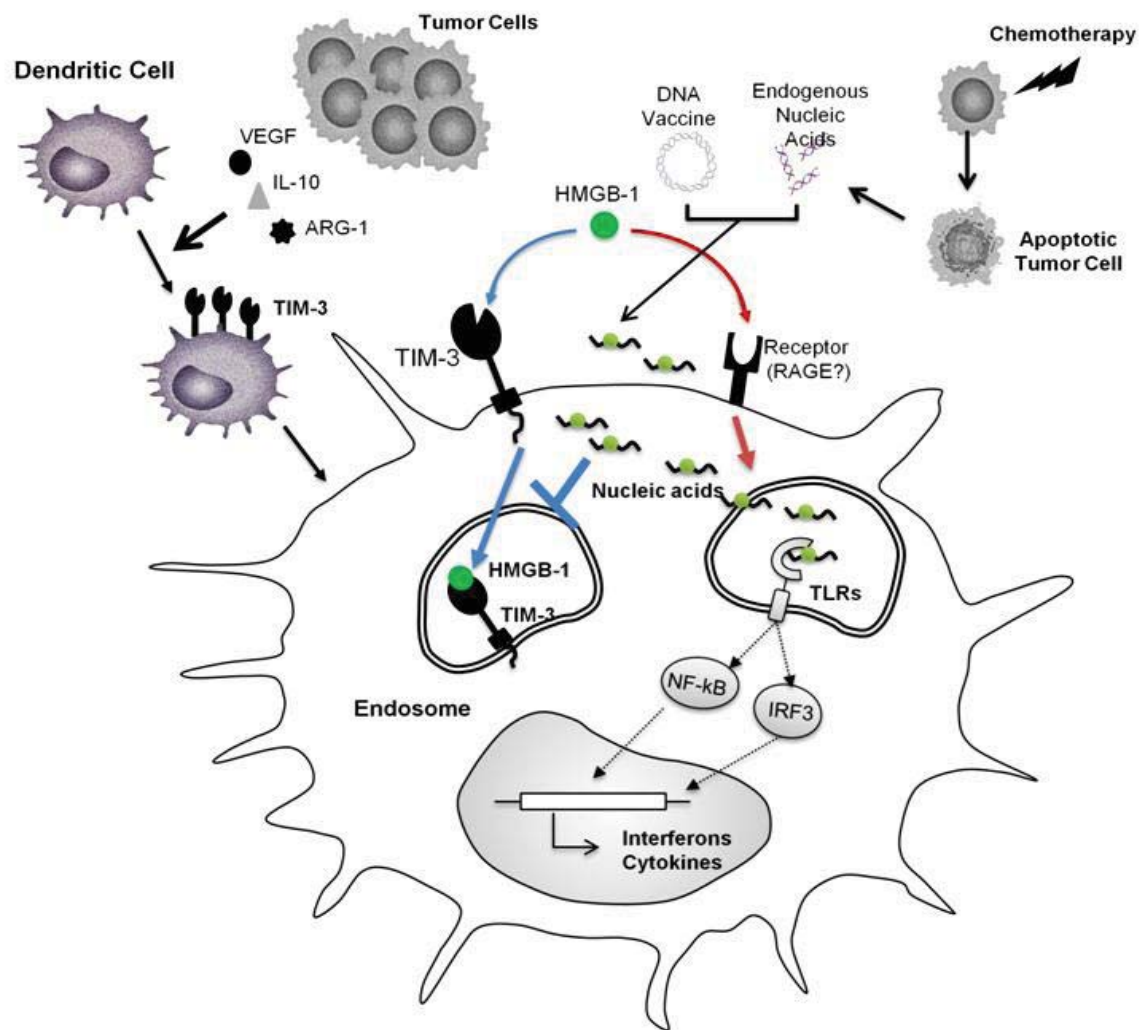

**Supplementary Figure 8. TIM-3-mediated suppression of innate immune responses.**

The mechanisms by which DC-derived TIM-3 impedes innate antitumor immune responses are shown. Although the release of nucleic acids from dying tumor cells upon cytotoxic therapies or DNA adjuvants boost innate immune responses mediated by TLR- and/or cytosolic sensor-mediated pattern recognition pathways, tumor microenvironments modulate DC to upregulate TIM-3, which interferes with HMGB-1-mediated transport of nucleic acids into endosomal vesicles and thus impedes downstream signals activating innate immune responses.
